# Supplementary material
Source: PubMed Central journal article supplement (PMC2857024)

Supplemental Figure legends:

Supplemental Figure 1: Tip60-SIRT1 interaction increases following UV radiation. 293T cells were transfected with plasmids encoding Myc-SIRT1 together with plasmids encoding SFB-Tip60. Cells were mock treated or treated with UV radiation. Cell extracts were precipitated using S protein sepharose beads and analyzed by immunoblotting using antibodies as indicated.

Supplemental Figure 2: SIRT1 downregulation increases both Tip60 acetylation and p53 acetylation at K120 site. U2OS cells stably expressing SFB-Tip60 was transfected with SIRT1-specific siRNA or control siRNA. Cells were harvested and subjected to immunoblotting analysis using the indicated antibodies.

Supplemental Figure 1

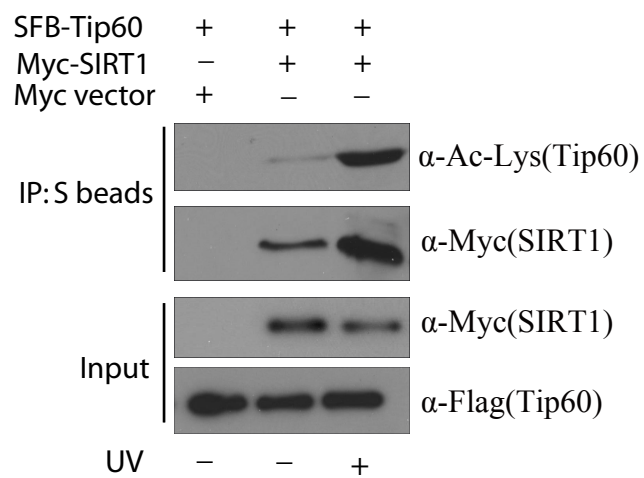

## Supplemental Figure 2

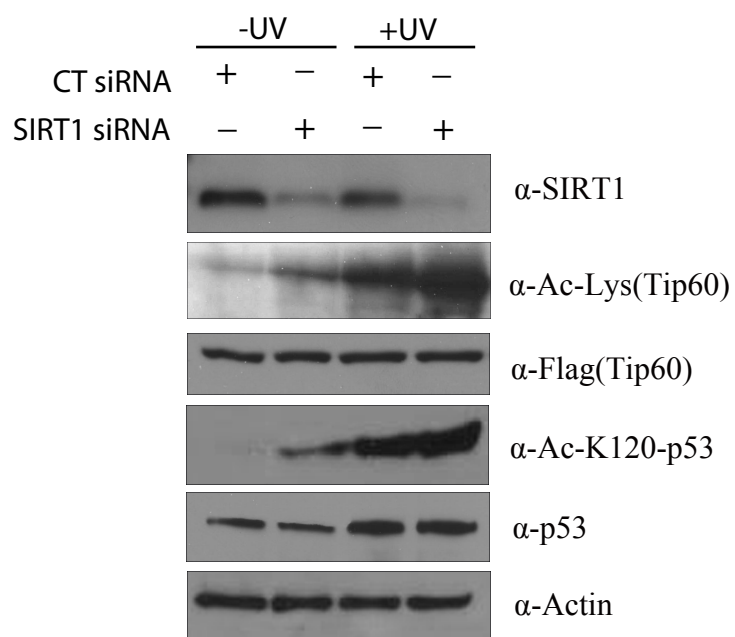

Supplement: supp_M109.087585_jbc.M109.087585-1.pdf [file supp_M109.087585_jbc.M109.087585-1.pdf]
